# Supplementary material for: Autocrine IFN-I inhibits isocitrate dehydrogenase in the TCA cycle of LPS-stimulated macrophages
Source: JCI journal article supplement (doi:10.1172/jci127597), 2019-09-03
Supplement: sd1 [file 1]

## **Supplemental Methods**

### **Reagents**

Murine IL-10 (Peprotech), neutralizing anti-mouse IFN $\beta$  Ab (PBL; 32401-1), neutralizing anti-IL-10 mAb (R&D Systems; clone JES052A5), IgG1 isotype control mAb (R&D systems; clone 43414), Poly (I:C) (Invivogen, tlr1-pic 25 $\mu$ g/ml), lactate assay kit (Abcam; ab65331) and aconitase enzyme activity kit (Abcam; ab109712).

### **Generation of bone marrow-derived macrophages**

For mouse bone marrow-derived macrophage (BMM) preparation, bone marrow cells were flushed from the femur and tibia bones of 8-12-week-old male wild-type (WT) (C57BL/6) or *Ifnar1*<sup>-/-</sup> mice, as before (1). Briefly, bone marrow cells were isolated and cultured in RPMI 1640 medium, supplemented with 10% heat-inactivated FCS, 2 mM GlutaMax-1, 100 U/ml penicillin, and 100 $\mu$ g/ml streptomycin in the presence of M-CSF (CSF-1) (2000 U/ml) at 37°C in a humidified incubator. On day 4, nonadherent cells were collected and cultured for a further 3d in M-CSF (2000 U/ml) to derive BMM. Adherent BMM were harvested on day 7 and were replated for experiments at 0.5 x 10<sup>6</sup> cells/ml.

### **Isolation and generation of human macrophages**

Human monocytes were purified from buffy coats (Red Cross Blood Bank, Melbourne, VIC, Australia), using RosetteSep Ab mixture (Stem Cell Technologies, Vancouver, BC, Canada), which negatively selects CD14<sup>+</sup> monocytes, followed by Ficoll-Paque density gradient centrifugation. Cells were then cultured in RPMI 1640 (supplemented as above) for 5d in M-CSF (2000U/ml) to differentiate them into monocyte-derived macrophages (MDM) (2) at 37°C in a humidified incubator.

### **Macrophage treatment for metabolomics and U-<sup>13</sup>C-labeling studies**

For metabolomic analyses, BMM (at day 7) were stimulated with LPS (Invivogen, 100ng/ml) or PBS for 24h in RPMI 1640 medium, supplemented with 10% heat-inactivated FCS, 2 mM GlutaMax-1, 100 U/ml penicillin, and 100 µg/ml streptomycin in the presence of M-CSF (2000 U/ml). At completion of an experiment cell lysates were prepared for extraction (see below). For labeling experiments, BMM were treated with LPS (100ng/ml) or PBS for 24h in RPMI 1640 (10% heat-inactivated FCS, 2000U/ml M-CSF and 100 U/ml penicillin, and 100µg/ml streptomycin) containing U-<sup>13</sup>C-glucose (1mM). At the completion of experiment cell lysates were prepared for extraction (see below). For metabolic and <sup>13</sup>C-labeling studies with IFNβ blockade, BMM were preincubated for 1h with 50 units/ml of a neutralizing anti-IFNβ Ab or the equivalent amount of rabbit IgG control antibody, prior to 24h treatment with LPS (100ng/ml). At the completion of the experiment cell lysates were prepared for extraction (see below).

### **Metabolite extraction and gas chromatography-mass spectrometry (GC-MS) analysis**

BMM (1 x 10<sup>6</sup> cells/plate) were washed with Milli-Q water at 37°C then snap-frozen by covering the plate in liquid nitrogen. Metabolites were extracted on ice by addition of 600µl/plate of methanol;chloroform (9:1 v/v), containing the internal standards, U-<sup>13</sup>C-sorbitol (16.6µM) and <sup>13</sup>C<sub>5</sub>,<sup>15</sup>N-valine (166µM). Cells were scraped and incubated on ice for 10 min. Samples were then centrifuged (5 min, 14,000 rpm, 4°C) to pellet precipitated proteins and the supernatants transferred to fresh Eppendorf tubes. GC-MS analysis was carried out on a Shimadzu GC/MS-TQ8040 system and analyzed in MRM mode using the Shimadzu Smart Metabolites Database containing 470 MRM metabolite targets.

### **U-<sup>13</sup>C-stable isotope labelling analysis**

U-<sup>13</sup>C-labelled cells were prepared for GC-MS analysis as described above. Samples were analysed on an Agilent 7890 GC coupled to a 5975 mass selective detector. Conditions for instrument analysis, data processing and isotopic background correction (3).

### **Seahorse metabolic assay**

A Seahorse utility plate (Seahorse Bioscience) containing calibrant medium (200µL/well) together with Seahorse injector port and probe plate were incubated overnight in 37°C without CO<sub>2</sub>. The following day, the medium from Seahorse cell culture plate was replaced with Seahorse XF assay buffer (supplemented with 10mM glucose and 2mM glutamine) and incubated in CO<sub>2</sub>-free incubator at 37°C for at least half an hour. WT and *Ifnar1*<sup>-/-</sup> BMM (untreated and LPS-stimulated) were then plated at 8 x 10<sup>4</sup> cells/well in a 96 well Seahorse cell culture plate (Agilent XFe96) with one well per corner of the plate containing supplemented-medium without cells, as background control. The real-time oxygen consumption (OCR) and extracellular acidification (ECAR) were determined on a Seahorse XF-e96 Bioanalyzer (Agilent) after calibration of the utility plate with injector port plate as per manufacturer's instruction.

### **Isocitrate dehydrogenase activity assay**

Isocitrate dehydrogenase activity was measured using a colorimetric assay kit (Abcam; ab102528), according to the manufacturer's instructions. Briefly, BMM or MDM (1x10<sup>6</sup>) were lysed in 200µl of the provided assay buffer. The lysates were centrifuged at 13,000 g for 10 min and the cleared supernatant used for the assay. NAD<sup>+</sup>/NADP<sup>+</sup> was used as substrate for the IDH assay. Total IDH activity was measured at 37°C with absorbance read at 450 nm in kinetic mode over 30 min on a Varioskan Lux Plate Reader (Thermo Fisher). Activity (mU/ml) is expressed as one unit of IDH that will generate 1µmol of NADH/NADPH per min at pH 8 at 37°C.

## **Quantitative PCR**

Total RNA was extracted using ISOLATE II RNA Mini Kit (Bioline, London, UK) and quantified using a Nanodrop 2000 UV-visible spectrophotometer. cDNA was prepared using SuperScript III reverse transcriptase (Invitrogen), according to manufacturer's instructions. Quantitative PCR (qPCR) was performed using predeveloped Taqman probe/primer combinations for murine *Irg1*, *Idh1*, *Idh2*, *Idh3a*, *Idh3b* and *Idh3g* on the QuantStudio 5 Real-Time PCR System (Thermo Fisher). Threshold cycle numbers were transformed to delta-Ct values, and the results were expressed relative to the reference gene, *Hprt*.

## **Immunoblots**

Briefly, macrophages ( $3 \times 10^6$ ) were lysed with RIPA buffer (25mM Tris-HCl pH 7.6, 150mM NaCl, 1% NP-40, 1% sodium deoxycholate, 0.1% SDS, and complete protease inhibitors) at 4°C and whole cell extracts collected. Lysates were clarified by centrifugation at  $13,000 \times g$  for 10 min at 4°C and protein concentrations were determined with a Bio-Rad protein assay kit and equal amounts of protein were separated on a NuPAGE Novex (4%-12%) Bis-Tris gel (Thermo Fisher Scientific) and transferred onto PVDF membrane (Bio-Rad). Membranes were probed with antibodies against *Irg1* (EPR22066), *Idh1* (EPR12296) (abcam) and  $\beta$ -actin (clone AC-74, Sigma-Aldrich). Binding was visualized by incubation with horseradish peroxidase (HRP)-conjugated secondary antibodies and chemilluminescence (ECL). Western blots are representative of three independent experiments.

## **Statistics**

Statistical analysis was performed using Prism software (GraphPad Software 7.03). Pairwise comparisons were performed using an unpaired Student t test and multivariate comparisons were performed using one-way ANOVA (Kruskal-Wallis test) with a Tukey's multiple comparisons test or a two-way ANOVA with a Sidak's multiple comparisons test for grouped

analyses. For mass spectroscopy, the data subjected to statistical analysis are the metabolites' abundance measured as area under the observed peak that defines a metabolite. This data was pre-treated before statistical analysis to account for biological, experimental and instrument variations by performing a natural log transformation followed by normalizing the data to the median metabolic abundance of each sample. The resulting data (groups) were then compared using a Student's t-test for unpaired data with  $\alpha = 0.05$ . In addition, the results of the Student's t-test were controlled for false positives using the Benjamini-Hochberg method (4). The above statistical tests were performed using MetaboAnalyst.

## Supplemental References

1. Fleetwood AJ, O'Brien-Simpson NM, Veith PD, et al. Porphyromonas gingivalis-derived RgpA-Kgp Complex Activates the Macrophage Urokinase Plasminogen Activator System: IMPLICATIONS FOR PERIODONTITIS. *J Biol Chem.* 2015;290(26):16031-16042.
2. Lacey DC, Achuthan A, Fleetwood AJ, et al. Defining GM-CSF–and macrophage-CSF–dependent macrophage responses by in vitro models. *The Journal of Immunology.* 2012;188(11):5752-5765.
3. Kowalski GM, De Souza DP, Burch ML, et al. Application of dynamic metabolomics to examine in vivo skeletal muscle glucose metabolism in the chronically high-fat fed mouse. *Biochem Biophys Res Commun.* 2015;462(1):27-32.
4. Benjamini Y, Hochberg Y. Controlling the False Discovery Rate - a Practical and Powerful Approach to Multiple Testing. *J Roy Stat Soc B Met.* 1995;57(1):289-300.

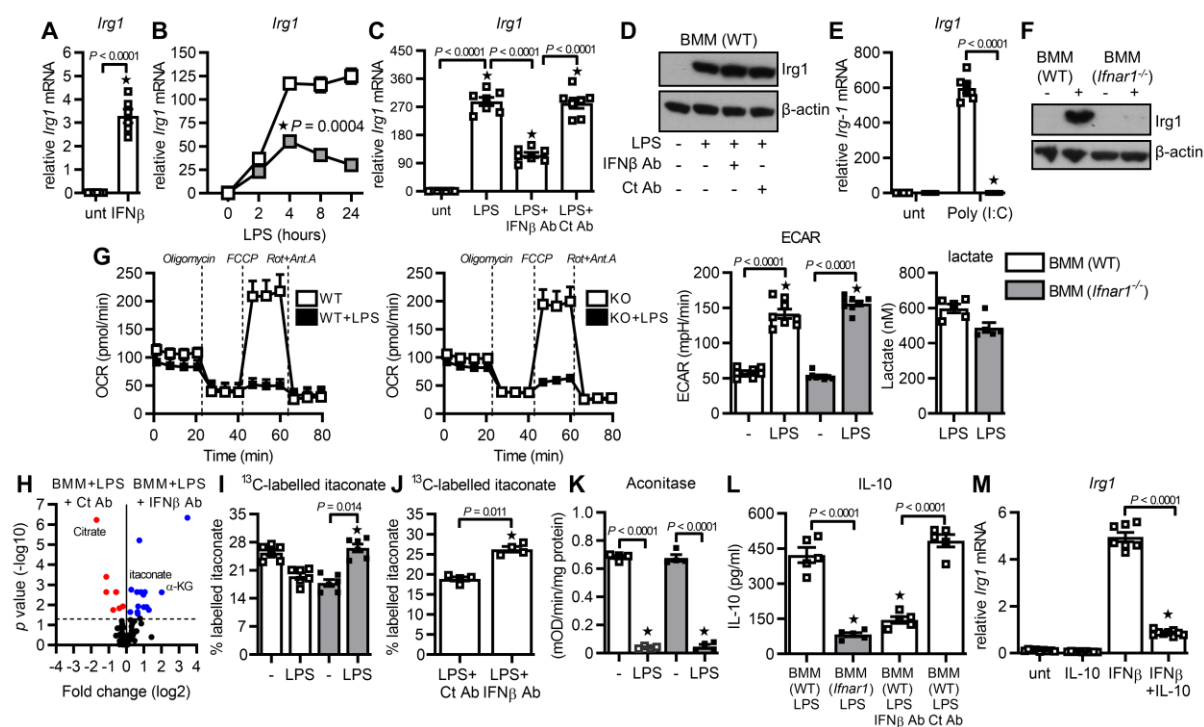

**Figure S1. The autocrine type I IFN pathway drives metabolic reprogramming in macrophages.** *Irg1* in (A) WT BMM treated  $\pm$  IFN $\beta$  (1000U/ml) for 24h (n=6) or (B) in WT and *Ifnar1*<sup>-/-</sup> BMM treated with LPS (100ng/ml, 0-24h, n=3). (C) *Irg1* gene (n=7) and (D) protein in WT BMM treated with LPS (100ng/ml, 24h) plus anti-IFN $\beta$  Ab or Ct Ab. (E) *Irg1* gene (n=6) and (F) protein in WT and *Ifnar1*<sup>-/-</sup> BMM treated with Poly (I:C) (25 $\mu$ g/ml, 24h). (G) Real-time oxygen consumption (OCR), extracellular acidification (ECAR) and lactate secretion in WT and *Ifnar1*<sup>-/-</sup> BMM treated with LPS (100ng/ml, 24h). (H) Volcano plot of metabolite pools in BMM stimulated with LPS (100ng/ml, 24h)  $\pm$  anti-IFN $\beta$  Ab or Ct Ab. <sup>13</sup>C-glucose-labeling of itaconate in (I) BMM (WT and *Ifnar1*<sup>-/-</sup>) treated  $\pm$  LPS (100ng/ml, 24h) or (J) WT BMM treated with LPS (100ng/ml, 24h) in the presence of anti-IFN $\beta$  Ab or Ct Ab. Cells were treated with <sup>13</sup>C-glucose (10mM) for 24h and analyzed by GC-MS. The mean percentage labeling  $\pm$  SEM (n=3-4). (K) Aconitase activity in WT and *Ifnar1*<sup>-/-</sup> BMM treated with LPS (100ng/ml, 24h, n=4). (L) IL-10 release (by ELISA) from WT and *Ifnar1*<sup>-/-</sup> BMM stimulated with LPS (100ng/ml, 24h) in the presence of anti-IFN $\beta$  Ab or Ct Ab. (M) *Irg1* expression in WT BMM treated with IL-10 (50ng/ml) and/or IFN $\beta$  (1000U/ml) for 24h (n=7). Data are mean  $\pm$  SEM. *P* values by two-way ANOVA (in B), one-way ANOVA (in C/E/G/I/K/L/M) or Student's t-test (in A/G/J).

**Table S1. Differentially abundant metabolites (p<0.05) in LPS-stimulated WT BMM vs. LPS-stimulated *Ifnar1*<sup>-/-</sup> BMM as determined by GC-MS.**

| <b>Compound</b>        | <b>Fold change<sup>a</sup></b> | <b>BH Adjusted p-value<sup>b</sup></b> |
|------------------------|--------------------------------|----------------------------------------|
| 2-Aminopimelic acid    | 0.18066                        | 1.04E-09                               |
| Citric acid            | 0.18255                        | 1.42E-09                               |
| Galacturonic acid      | 2.8388                         | 1.49E-06                               |
| Monostearin            | 75.874                         | 9.56E-06                               |
| Ribose 5-phosphate     | 2.9731                         | 2.43E-05                               |
| Glutathione            | 6.9566                         | 2.60E-05                               |
| Glucuronic acid        | 1.8667                         | 2.87E-05                               |
| Glucaric acid          | 1.7706                         | 4.34E-05                               |
| 2-Ketoglutaric acid    | 3.2227                         | 5.71E-05                               |
| Urea                   | 2.0754                         | 8.44E-05                               |
| Galacturonic acid      | 2.0915                         | 0.00017                                |
| Methylsuccinic acid    | 2.4474                         | 0.000285                               |
| Isocitric acid         | 1.9427                         | 0.00031                                |
| 4-Hydroxyproline       | 1.7052                         | 0.000432                               |
| Niacinamide            | 2.3918                         | 0.00056                                |
| Cysteine               | 2.8241                         | 0.000976                               |
| Glucose 6-phosphate    | 1.9841                         | 0.000987                               |
| Glucose 6-phosphate    | 1.9462                         | 0.001153                               |
| Aconitic acid          | 0.53348                        | 0.001208                               |
| Mesaconic acid         | 1.4931                         | 0.001899                               |
| Alanine                | 1.4888                         | 0.002348                               |
| Itaconic acid          | 1.3595                         | 0.003409                               |
| Xylitol                | 1.833                          | 0.005061                               |
| Fructose 6-phosphate   | 1.8435                         | 0.00578                                |
| Proline                | 1.9343                         | 0.006694                               |
| Threonic acid          | 1.3492                         | 0.006927                               |
| 6-Phosphogluconic acid | 1.3965                         | 0.008227                               |
| Malic acid             | 0.78412                        | 0.01915                                |
| Batyl alcohol          | 0.67721                        | 0.030185                               |
| 1,6-Anhydroglucose     | 1.3453                         | 0.034766                               |
| Citramalic acid        | 0.74618                        | 0.036148                               |
| Serine                 | 1.3884                         | 0.037036                               |
| Adenosine              | 1.6076                         | 0.03807                                |
| Pantothenic acid       | 1.3398                         | 0.039527                               |
| Phenylacetic acid      | 0.79456                        | 0.041506                               |
| Octadecanol            | 0.70965                        | 0.048572                               |

<sup>a</sup>Indicates fold change of metabolite pool size. Values > 1 indicate metabolites increased in LPS-stimulated *Ifnar1*<sup>-/-</sup> BMM. Values < 1 indicate metabolites increased in LPS-stimulated WT BMM. <sup>b</sup>p-value by Student's t test (Benjamin-Hochberg post hoc procedure).



**Table S2. Differentially abundant metabolites (p<0.05) in untreated vs. LPS-stimulated WT BMM as determined by GC-MS.**

| <b>Compound</b>            | <b>Fold change<sup>a</sup></b> | <b>BH Adjusted p-value<sup>b</sup></b> |
|----------------------------|--------------------------------|----------------------------------------|
| Itaconic acid              | 12.328                         | 5.02E-09                               |
| Succinic acid              | 4.4549                         | 1.66E-07                               |
| Citric acid                | 4.0656                         | 8.47E-06                               |
| 2-Aminopimelic acid        | 4.0086                         | 8.47E-06                               |
| Isocitric acid             | 0.17332                        | 8.66E-06                               |
| Aspartic acid              | 0.21465                        | 0.000236                               |
| 3-Aminoglutaric acid       | 0.21577                        | 0.000236                               |
| 2-Ketoglutaric acid        | 0.23781                        | 0.000447                               |
| Lactic acid                | 2.4434                         | 0.002203                               |
| Dihydroxyacetone phosphate | 1.5184                         | 0.004944                               |
| Batyl alcohol              | 0.57711                        | 0.005784                               |
| Glycerol 3-phosphate       | 1.4778                         | 0.00615                                |
| 6-Phosphogluconic acid     | 0.65324                        | 0.006257                               |
| Fructose 6-phosphate-meto  | 2.6677                         | 0.006739                               |
| Inositol                   | 0.67626                        | 0.008901                               |
| 4-Hydroxyproline           | 0.55338                        | 0.011011                               |
| Cholesterol                | 0.70139                        | 0.028356                               |
| Inositol phosphate         | 0.68514                        | 0.029179                               |
| Glutamic acid              | 0.42417                        | 0.035944                               |
| 2-Ketoisocaproic acid      | 0.54245                        | 0.040095                               |
| Caproic acid               | 0.8087                         | 0.040095                               |
| Histidine                  | 0.50897                        | 0.041412                               |
| Arabinose                  | 58.825                         | 0.047445                               |
| Cysteine                   | 0.44841                        | 0.047445                               |
| Glycerol                   | 1.6743                         | 0.047445                               |
| Glucaric acid              | 1.5209                         | 0.047445                               |
| Threonic acid              | 1.4585                         | 0.047445                               |
| Mesaconic acid             | 1.3322                         | 0.047445                               |
| 2-Hydroxyglutaric acid     | 1.3262                         | 0.047445                               |

<sup>a</sup>Indicates fold change of metabolite pool size. Values > 1 indicate metabolites increased in LPS-stimulated WT BMM. Values < 1 indicate metabolites increased in untreated WT BMM. <sup>b</sup>p-value by Student's t test (Benjamin-Hochberg post hoc procedure).

**Table S3. Differentially abundant metabolites (p<0.05) in untreated vs. LPS-stimulated *Ifnar1*<sup>-/-</sup> BMM as determined by GC-MS.**

| <b>Compound</b>      | <b>Fold change<sup>a</sup></b> | <b>BH Adjusted p-value<sup>b</sup></b> |
|----------------------|--------------------------------|----------------------------------------|
| Itaconic acid        | 109                            | 4.60E-13                               |
| Isocitric acid       | 0.27592                        | 4.89E-10                               |
| Glucaric acid        | 2.6771                         | 6.01E-10                               |
| Succinic acid        | 4.9331                         | 3.41E-09                               |
| 2-Aminopimelic acid  | 0.62973                        | 3.07E-08                               |
| Aspartic acid        | 0.21855                        | 5.12E-08                               |
| 3-Aminoglutaric acid | 0.21921                        | 5.17E-08                               |
| Glucuronic acid      | 3.0866                         | 7.35E-08                               |
| Citric acid          | 0.63512                        | 1.58E-07                               |
| Mesaconic acid       | 3.7968                         | 3.06E-07                               |
| Galacturonic acid    | 2.6228                         | 2.46E-06                               |
| Methylsuccinic acid  | 5.465                          | 2.61E-06                               |
| Lactic acid          | 2.653                          | 6.75E-06                               |
| Monostearin          | 61.556                         | 1.51E-05                               |
| Fructose 6-phosphate | 4.1608                         | 3.53E-05                               |
| N-Acetylmannosamine  | 0.64326                        | 6.82E-05                               |
| Arachidonic acid     | 0.53911                        | 0.000126                               |
| Threonic acid        | 1.7085                         | 0.00017                                |
| Glutathione          | 4.2544                         | 0.000255                               |
| Glucose 6-phosphate  | 2.6436                         | 0.000295                               |
| Galacturonic acid    | 1.9482                         | 0.00058                                |
| Niacinamide          | 2.3488                         | 0.000854                               |
| Inositol             | 0.64737                        | 0.000861                               |
| Decanoic acid        | 0.63409                        | 0.00175                                |
| Glutamic acid        | 0.60159                        | 0.001763                               |
| Cholesterol          | 0.62728                        | 0.001939                               |
| Batyl alcohol        | 0.59299                        | 0.002164                               |
| Inositol phosphate   | 0.68966                        | 0.002208                               |
| Acetoacetic acid     | 0.63764                        | 0.003444                               |
| 1-Hexadecanol        | 0.70573                        | 0.003471                               |
| Elaidic acid         | 0.75999                        | 0.003814                               |
| Octanoic acid        | 0.68107                        | 0.0041                                 |
| Phenylacetic acid    | 0.72701                        | 0.004279                               |
| Octadecanol          | 0.69975                        | 0.006288                               |
| N-Acetylserine       | 0.73356                        | 0.006434                               |
| Urea                 | 1.4987                         | 0.007012                               |

<sup>a</sup>Indicates fold change of metabolite pool size. Values > 1 indicate metabolites increased in LPS-stimulated *Ifnar1*<sup>-/-</sup> BMM. Values < 1 indicate metabolites increased in untreated *Ifnar1*<sup>-/-</sup> BMM. <sup>b</sup>p-value by Student's t test (Benjamin-Hochberg post hoc procedure).

**Table S4. Differentially abundant metabolites (p<0.05) in untreated WT vs. untreated *Ifnar1*<sup>-/-</sup> BMM as determined by GC-MS.**

| <b>Compound</b>            | <b>Fold change<sup>a</sup></b> | <b>BH Adjusted p-value<sup>b</sup></b> |
|----------------------------|--------------------------------|----------------------------------------|
| Itaconic acid              | 0.15376                        | 4.24E-09                               |
| Dihydroxyacetone phosphate | 1.5727                         | 2.91E-05                               |
| Glycerol 3-phosphate       | 1.5656                         | 3.62E-05                               |
| Methylsuccinic acid        | 0.31782                        | 0.00011366                             |
| Mesaconic acid             | 0.52388                        | 0.00011407                             |
| Batyl alcohol              | 0.65908                        | 0.00035427                             |
| N-Acetylserine             | 1.5392                         | 0.0019112                              |
| Glycolic acid              | 1.2205                         | 0.0089839                              |
| Citramalic acid            | 0.69591                        | 0.0090547                              |
| Glucuronic acid            | 0.7382                         | 0.010357                               |

<sup>a</sup>Indicates fold change of metabolite pool size. Values > 1 indicate metabolites increased in untreated *Ifnar1*<sup>-/-</sup> BMM. Values < 1 indicate metabolites increased in untreated WT BMM.

<sup>b</sup>p-value by Student's t test (Benjamin-Hochberg post hoc procedure).

**Table S5. Differentially abundant metabolites ( $p < 0.05$ ) in LPS-treated WT BMM in the presence of a neutralizing anti-IFN $\beta$  Ab or an isotype control Ab as determined by GC-MS.**

| <b>Compound</b>          | <b>Fold change<sup>a</sup></b> | <b>BH Adjusted p-value<sup>b</sup></b> |
|--------------------------|--------------------------------|----------------------------------------|
| 2-Aminoheptanedioic acid | 0.18166                        | 2.37E-10                               |
| Citric acid              | 0.17962                        | 6.12E-10                               |
| Ornithine                | 31.483                         | 1.21E-08                               |
| MG180e/00/00             | 2.0543                         | 4.80E-07                               |
| O-Phosphoethanolamine    | 0.31837                        | 1.35E-06                               |
| Itaconic acid            | 1.2973                         | 2.80E-05                               |
| L-Aspartic acid          | 0.5533                         | 3.66E-05                               |
| 3-aminoglutaric acid     | 0.55814                        | 4.09E-05                               |
| Methylsuccinic acid      | 2.5133                         | 7.87E-05                               |
| D-Ribose 5-phosphate     | 2.7548                         | 0.00010067                             |
| Galacturonic acid        | 2.2434                         | 0.000101                               |
| Glucaric acid            | 1.7999                         | 0.00017393                             |
| cis-Aconitic acid        | 0.65445                        | 0.0012739                              |
| Isocitric acid           | 1.8706                         | 0.001915                               |
| L-Cysteine               | 3.0994                         | 0.0022821                              |
| Palmitoleic acid         | 2.4936                         | 0.0028957                              |
| Hydroxylamine            | 0.4349                         | 0.0032146                              |
| Creatinine               | 1.883                          | 0.0034233                              |
| 3-Phosphoglyceric acid   | 3.3864                         | 0.0043679                              |
| L-2-Hydroxyglutaric acid | 1.2289                         | 0.0045561                              |
| D-Fructose               | 1.8038                         | 0.0064244                              |
| Putrescine               | 2.1499                         | 0.010776                               |
| Fumaric acid             | 0.77484                        | 0.014054                               |
| Beta-Alanine             | 0.75883                        | 0.015253                               |
| L-Proline                | 1.5483                         | 0.016686                               |
| Ethanolamine             | 1.2335                         | 0.023638                               |
| 4-Hydroxyproline         | 1.3862                         | 0.023807                               |
| Pyruvic acid             | 2.0286                         | 0.027628                               |
| Glycerol                 | 0.70814                        | 0.03795                                |
| 2-Ketoglutaric acid      | 1.8149                         | 0.040576                               |

<sup>a</sup>Indicates fold change of metabolite pool size. Values  $> 1$  indicate increased in LPS + anti-IFN $\beta$  Ab treated WT BMM. Values  $< 1$  indicate metabolites increased in LPS + isotype control Ab treated WT BMM. <sup>b</sup> $p$ -value by Student's t test (Benjamin-Hochberg post hoc procedure).
